# Supplementary material
Source: PubMed Central journal article supplement (PMC5177552)
Supplement: 10-1055-s-0042-116494-sup_gf1099.pdf [file 10-1055-s-0042-116494-sup_gf1099.pdf]

# Diagnostik des Herpes genitalis, einschließlich antiviraler Therapie und prophylaktischer Möglichkeiten

## Herpes Genitalis: Diagnosis, Treatment and Prevention

**Autor**

**A. Sauerbrei**

**Institut**

Institut für Virologie und Antivirale Therapie, Konsiliarlabor für HSV und VZV, Universitätsklinikum Jena, Jena

### Schlüsselwörter

- Herpes-simplex-Virus
- Herpes genitalis
- Labordiagnostik
- antivirale Therapie
- Prophylaxe

### Key words

- herpes simplex virus
- herpes genitalis
- laboratory diagnostics
- antiviral therapy
- prophylaxis

**eingereicht** 23. 6. 2016

**revidiert** 15. 8. 2016

**akzeptiert** 1. 9. 2016

### Bibliografie

**DOI** <http://dx.doi.org/10.1055/s-0042-116494>  
 Online-publiziert 18. 10. 2016  
 Geburtsh Frauenheilk 2016; 76:  
 1–9 © Georg Thieme Verlag KG  
 Stuttgart · New York ·  
 ISSN 0016-5751

### Korrespondenzadresse

**Prof. Dr. Andreas Sauerbrei**  
 Institut für Virologie  
 und Antivirale Therapie  
 Konsiliarlabor für HSV und VZV  
 Universitätsklinikum Jena  
 Hans-Knöll-Straße 2  
 07745 Jena  
 Andreas.Sauerbrei@  
 med.uni-jena.de

### Zusammenfassung

Der Herpes genitalis wird durch Herpes-simplex-Virus Typ 1 oder Typ 2 hervorgerufen und kann sich als primäre und rekurrende Infektion manifestieren. Die Erkrankung gehört zu den häufigsten sexuell erworbenen Infektionskrankheiten und stellt aufgrund ihrer physikalischen und psychosozialen Morbidität ein erhebliches und oft unterschätztes medizinisches Problem dar. In der vorliegenden Übersichtsarbeit werden neben medizinischen Grundkenntnissen zum Erreger des Herpes genitalis und der Erkrankung wesentliche Aspekte der Labordiagnostik, einschließlich antiviraler Therapie und prophylaktischer Möglichkeiten vermittelt. Der Beitrag wendet sich an alle Mitarbeiter im Gesundheitsdienst, die Patienten mit Herpes genitalis betreuen, und zielt darauf ab, die häufig unzureichende Beratung sowie Maßnahmen bez. einer gezielten Diagnostik, Therapie und Prävention bei den betroffenen Patienten zu verbessern.

### Einleitung

Der Herpes genitalis gehört zu den häufigsten sexuell übertragenen Infektionskrankheiten. Als Erreger gelten das Herpes-simplex-Virus Typ 2 (HSV-2), aber auch zunehmend das Herpes-simplex-Virus Typ 1 (HSV-1). Bei beiden Erregern handelt es sich um behüllte DNS-Viren mit geringer Stabilität gegenüber Desinfektionsmitteln und Umwelteinflüssen [1]. Aufgrund einer ausgeprägten genetischen Homologie bestehen bei HSV-1 und HSV-2 zahlreiche biologische Gemeinsamkeiten und antigene Kreuzreaktionen. Als typenspezifische Epitope gelten die viralen Glykoproteine (g) gG (HSV-1 und HSV-2) sowie gC (HSV-1) [2, 3]. Der Hauptübertragungsweg von HSV-1 und HSV-2 ist der direkte Kontakt. Nach dem Abbau der

### Abstract

Herpes genitalis is caused by the herpes simplex virus type 1 or type 2 and can manifest as primary or recurrent infection. It is one of the most common sexually transmitted infections and due to associated physical and psychological morbidity it constitutes a considerable, often underestimated medical problem. In addition to providing the reader with basic knowledge of the pathogen and clinical presentation of herpes genitalis, this review article discusses important aspects of the laboratory diagnostics, antiviral therapy and prophylaxis. The article is aimed at all health-care workers managing patients with herpes genitalis and attempts to improve the often suboptimal counselling, targeted use of laboratory diagnostics, treatment and preventive measures provided to patients.

maternalen Antikörper während des 1. Lebensjahrs treten Erstinfektionen mit HSV-1 vor allem im Kindesalter auf. Aktuelle Seroprävalenzdaten aus Deutschland zeigen einen Anstieg von Anti-HSV-1-IgG auf ca. 20% im Alter von 2–3 Jahren, auf 57% bei 10- bis 12-jährigen Kindern, auf ca. 70% im Alter von 16–18 Jahren sowie auf ca. 80% bei 28–30-jährigen Erwachsenen [4]. Ab dem 40. Lebensjahr kann man von einer HSV-1-Seroprävalenz in Höhe von  $\geq 85$ –90% ausgehen [5]. Da HSV-2 hauptsächlich über den Geschlechtsverkehr übertragen wird, ist ein Anstieg der Durchseuchung erst nach der Pubertät zu verzeichnen. In Deutschland steigt die Prävalenz der HSV-2-IgG-Antikörper von ca. 3% bei 10–15-jährigen auf 7% im Alter von 16–18 Jahren und auf ca. 14% bei Erwachsenen [4]. Höhere Seroprävalenzen lassen sich länderübergreifend bei Per-

sonen mit häufig wechselnden Sexualpartnern sowie bei homosexuellen Männern nachweisen [6]. In mehreren Studien konnte eine signifikant höhere HSV-2-Seroprävalenz bei Frauen im Vergleich zu Männern belegt werden [4,5]. Als Ursache dafür wird diskutiert, dass Männer häufiger als Frauen zu asymptomatischen genitalen HSV-2-Infektionen neigen, was zu höheren Virustransmissionsraten vom Mann auf die Frau führt [7]. Zwischen HSV-1 und HSV-2 besteht eine partielle klinische Kreuzimmunität, weshalb bei bestehender HSV-1-Immunität eine genitale HSV-2-Primärinfektion auch asymptomatisch verlaufen kann und vice versa. Eine reduzierte HSV-1-Seroprävalenz bei Jugendlichen und Erwachsenen kann mit einer höheren Anzahl primärer HSV-2-Infektionen oder primärer HSV-1-Infektionen durch oralen Geschlechtsverkehr einhergehen. Dafür ließen sich bislang Belege in den USA [8,9], aber nicht in Deutschland aufzeigen. Genitale HSV-2-Infektionen können mit einem erhöhten Risiko einer HIV-Infektion einhergehen [10].

## Erkrankung und Virusübertragung

### Primärer Herpes genitalis

Primäre genitale HSV-1- oder HSV-2-Infektionen sind in den meisten Fällen nicht mit Symptomen verbunden und verlaufen asymptomatisch [11]. Im Vordergrund des klassischen klinischen Bildes eines primären Herpes genitalis stehen ca. 4–7 Tage nach Sexualkontakt auftretende und bis zu 3 Wochen bestehende Haut- und Schleimhautläsionen in Form von Flecken und Papeln, aus denen sich Bläschen, Pusteln und Ulzera entwickeln [12]. Zu den typischen Symptomen gehören ebenfalls Schmerzen, insbesondere eine schmerzhaft, entzündliche Schwellung der Vulva bei der Frau, Brennen und Dysurie. Begleitsymptome können relativ häufig als Lymphadenopathie, Fieber oder in Form einer Zervizitis bei der Frau bzw. Proktitis beim Mann bestehen. Der Genitalherpes kann sich insbesondere im weiblichen Genitalbereich auch untypisch manifestieren, was eine klinische Diagnose deutlich erschwert. Relativ häufig sind diagnostische Hinweise auf Herpesläsionen am Muttermund ohne klinische Symptome sowie Manifestationen im Bereich der Urethra mit ausgeprägten Miktionsproblemen zu beobachten.

### Rezidivierender Herpes genitalis

Nach Ausbruch der Primärinfektion etablieren die Viren eine lebenslange Latenz in sensorischen Nervenganglien [13], wobei bei primären genitalen Infektionen insbesondere die Sakralganglien betroffen sind. Von dort aus können die Viren reaktiviert werden und zu rezidivierenden Infektionen führen. Virusreaktivierungen sind bei immunogenetischer Prädisposition häufig, ihre Prävalenz nimmt jedoch mit zunehmendem Alter ab. Zahlreiche physiologische oder Umwelteinflüsse, wie z.B. Fieber, UV-Licht, Menstruation, Stress oder Traumata, können als Auslöser von Virusreaktivierungen fungieren [14,15]. Endogene Virusreaktivierungen können sich zum einen als rezidivierender Herpes genitalis manifestieren. Was die Häufigkeit betrifft, so erleiden nahezu alle Personen mit symptomatischem primären Herpes genitalis durch HSV-2 auch Rezidive, die bei einem Drittel mit mindestens 6 Rezidiven pro Jahr häufig auftreten [16]. Genitale HSV-1-Infektionen treten dagegen über 5-mal seltener als Rezidiv auf [17]. Ein Rezidiv kündigt sich nahezu immer mit einer Prodromalsymptomatik wie neuralgischen Beschwerden, Dysästhesie oder Schmerzen im Bereich lumbosakraler Dermatome bis zu 1–2 Tage vor Ausbruch der Haut- und Schleimhautläsionen an [18].

Im Vergleich zur Primärinfektion ist die Symptomatik von rezidivierenden Infektionen deutlich geringer ausgeprägt und zeigt einen kürzeren Verlauf [19]. Entsprechend den Erfahrungen aus der beratenden Tätigkeit des Konsiliarlabors für HSV und VZV am Institut für Virologie und Antivirale Therapie des Universitätsklinikums Jena sind von häufigen rezidivierenden Herpesgenitalis-Erkrankungen insbesondere junge Frauen mit häufigen und ausgeprägten Stresssituationen in Familie und Beruf betroffen. Dabei ist zu berücksichtigen, dass das Auftreten von Rezidiven den emotionalen Stress ebenfalls stark fördern kann [20]. Betroffene Patienten und deren Sexualpartner leiden deshalb häufig unter erheblichen psychosozialen Problemen.

## Asymptomatische genitale Virusausscheidung

In der überwiegenden Anzahl der Fälle gehen endogene Virusreaktivierungen nicht mit klinischen Symptomen einher, sondern äußern sich nur in einer asymptomatischen genitalen Virusausscheidung. Am häufigsten wird HSV-2 von HSV-2-seropositiven Personen ausgeschieden, was bei nahezu allen anti-HSV-2-IgG-positiven Personen der Fall ist [21]. Im Gegensatz dazu wird eine Ausscheidung von HSV-1 nur selten beobachtet. Aufgrund dieser Daten kann man mit hoher Sicherheit davon ausgehen, dass HSV-2-seropositive Personen stets auch als potenzielle Virusausscheider anzusehen sind.

## Virusübertragung

Sowohl Personen mit klinisch manifestem Herpes genitalis als auch solche, die HSV asymptomatisch ausscheiden, können den Erreger auf ihren Sexualpartner übertragen. Dabei erfolgt die Übertragung nahezu immer über direkten Kontakt in Form des Geschlechtsverkehrs. In den USA wurde in den vergangenen Jahren von einer zunehmenden Häufigkeit genitaler HSV-1-Primärinfektionen insbesondere bei Jugendlichen und jungen Erwachsenen berichtet [8,9], was höchstwahrscheinlich auf häufigeren oralen Geschlechtsverkehr in dieser Altersgruppe zurückzuführen ist. Aufgrund seiner geringen Umweltstabilität kann HSV auf Oberflächen lediglich im feuchten Milieu über mehrere Tage infektiös sein [22]. Es ist deshalb mit hoher Wahrscheinlichkeit davon auszugehen, dass bei Einhaltung normaler Hygiene einschließlich Körperhygiene andere Übertragungsmechanismen als der Geschlechtsverkehr nur eine unbedeutende Rolle spielen. Ausnahmen bilden die intrauterine oder perinatale Virustransmission. Dabei können sowohl primäre als auch rezidivierende HSV-Infektionen der Schwangeren über eine intrauterine Virusübertragung zu kongenitalen HSV-Infektionen führen, deren Häufigkeit jedoch mit ca. 5% aller HSV-Infektionen des Neugeborenen gering ist [23]. Als Folgen der fetalen Infektion sind Aborte, Totgeburten oder angeborene Erkrankungen beschrieben, die sich symptomatisch meist mit Hautläsionen, Augenschäden und/oder neurologischen Symptomen manifestieren [24]. Das höchste Risiko für eine fetale Infektion besteht während der ersten 20 Schwangerschaftswochen sowie bei einer primären mütterlichen HSV-2-Infektion. Als häufigste Ursache neonataler HSV-Infektionen wird die Infektion des Kindes über den Genitaltrakt der Mutter während der Geburt angesehen, wovon 70–85% durch HSV-2 bedingt sind [25]. In den USA wird die Inzidenz mit 5–31 pro 100 000 Lebendgeburten angegeben, wobei die Prognose für HSV-2-Infektionen schlechter ist als für solche durch HSV-1 [23]. Für Deutschland sind keine Daten zur Häufigkeit neonataler HSV-Infektionen verfügbar. Das höchste Risiko besteht bei einer primären peripartalen HSV-Infektion der Mutter, jedoch werden die meisten neonatalen Infektionen nach asymp-

**Tab. 1** Methoden zum Nachweis des HSV und HSV-spezifischer Antikörper.

| Prinzip                                                       | Methode                                                                            | Anmerkungen                                                                                                                                                                                                                                                                                                                                                                                                                                                       |
|---------------------------------------------------------------|------------------------------------------------------------------------------------|-------------------------------------------------------------------------------------------------------------------------------------------------------------------------------------------------------------------------------------------------------------------------------------------------------------------------------------------------------------------------------------------------------------------------------------------------------------------|
| Virus-DNA-Nachweis                                            | Polymerasekettenreaktion (PCR)                                                     | <ul style="list-style-type: none"> <li>▶ Untersuchungsmaterial: Bläscheninhalt in Virustransportmedium mit Spezialtupfer, Liquor, Gewebe, bronchoalveoläre Lavage, EDTA-Blut, Fruchtwasser, Kammerwasser</li> <li>▶ kommerziell vertrieben, Basisdiagnostik</li> </ul>                                                                                                                                                                                            |
| Virusisolierung                                               | Anzüchtung in der Zellkultur, Nachweis/Typisierung mittels monoklonaler Antikörper | <ul style="list-style-type: none"> <li>▶ Untersuchungsmaterial: Bläscheninhalt in Virustransportmedium mit Spezialtupfer, Gewebe, bronchoalveoläre Lavage</li> <li>▶ Spezialdiagnostik</li> </ul>                                                                                                                                                                                                                                                                 |
| Virusantigen-Nachweis                                         | Immunfluoreszenztest mit monoklonalen Antikörpern                                  | <ul style="list-style-type: none"> <li>▶ Untersuchungsmaterial: Zellreicher Bläscheninhalt in Virustransportmedium mit Spezialtupfer, Gewebe</li> <li>▶ eingeschränkte Sensitivität und Spezifität, Basisdiagnostik</li> </ul>                                                                                                                                                                                                                                    |
| Nachweis typenübergreifender und typenspezifischer Antikörper | Enzyme-linked immunosorbent assay (ELISA)                                          | <ul style="list-style-type: none"> <li>▶ Bestimmung und Differenzierung der Ig-Klassen (IgG, IgM), in Serum, Plasma und Liquor</li> <li>▶ Bestimmung von Virustyp-spezifischen Antikörpern gegen die viralen Glykoproteine (gG-1, gC-1, gG-2)</li> <li>▶ Bestimmung von Virustyp-übergreifenden Antikörpern mit viralem Gesamtantigen aus HSV-1- oder HSV-2-infizierten Zellkulturen</li> <li>▶ kommerziell vertrieben, automatisiert, Basisdiagnostik</li> </ul> |
| Nachweis typenübergreifender Antikörper                       | indirekter Fluoreszenz-antikörpertest (IFAT)                                       | <ul style="list-style-type: none"> <li>▶ Bestimmung und Differenzierung der Ig-Klassen (IgG, IgM), in Serum, Plasma und Liquor</li> <li>▶ kommerziell vertrieben, erfordert Erfahrung bei der Auswertung, Spezialdiagnostik</li> </ul>                                                                                                                                                                                                                            |
| Nachweis typenspezifischer Antikörper                         | Immunoblot                                                                         | <ul style="list-style-type: none"> <li>▶ qualitative Bestimmung von Virustyp-spezifischen IgG-Antikörpern gegen die viralen Glykoproteine (gG1, gG2) in Serum</li> <li>▶ kommerziell vertrieben, z. T. automatisiert, Spezialdiagnostik</li> </ul>                                                                                                                                                                                                                |

tomatischer Virusausscheidung über den Genitaltrakt um den Geburtstermin beobachtet [23,26]. Die Erkrankungen können sich als lokalisierte Infektion von Haut, Augen und Schleimhäuten, Infektion des ZNS oder als disseminierte systemische Infektion manifestieren [27].

## Labordiagnostik

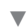

### Probeneinsendung

Herpes-simplex-Virus-haltige Proben müssen als gefahrgutrechtliche Stoffe der Kategorie B, Risikogruppe 2 nach UN 3373 versendet werden [22]. Dazu muss das Primärgefäß mit der Patientenprobe in einem Umverpackungsröhrchen und mit adsorbierendem Material in einem gekennzeichneten Transportbehältnis (Kartonbox) verschickt werden. Der Versand ist bei Raumtemperatur möglich. Kühlung wird nur empfohlen, wenn das Material für die Virusisolierung vorgesehen ist.

### Virusnachweis

Die Labordiagnose der akuten genitalen HSV-Infektion bzw. der asymptomatischen Virusausscheidung erfolgt über den direkten Virusnachweis (● **Tab. 1**). Methode der Wahl ist der Nachweis von Virusgenomen mittels Polymerasekettenreaktion (PCR) in Haut- bzw. Schleimhautabstrichen [28]. Am besten eignen sich Abstriche vom Inhalt bestehender Bläschen. Zur Einsendung sollte die Aufnahme der Probe in physiologische Kochsalzlösung oder Virustransportmedium erfolgen. Beim Vorliegen von Komplikationen unter Beteiligung anderer Organe sollten auch Liquor, Gewebe, bronchoalveoläre Lavage, Fruchtwasser, Kammerwasser, Serum oder EDTA-Blut einbezogen werden. Die PCR soll zwischen HSV-1 und HSV-2 unterscheiden [29], wozu In-House-Assays oder kommerziell vertriebene Kits zum Einsatz kommen [30]. Unabhängig von der eingesetzten qualitativen oder quantitativen Methodik wird die Sensitivität der PCR mit  $\geq 98\%$  und die Spezifität mit nahezu 100% angegeben [30]. Unter Berücksichtigung dieser Daten sowie einer reduzierten Stabilität viraler DNA, wenn das Untersuchungsmaterial über mehrere Tage bei Temperaturen über 20°C gelagert wird, schließt eine negative PCR

eine HSV-Infektion keinesfalls aus. Aktuelle Leitlinien sehen deshalb auch die Einleitung einer antiviralen Therapie bei typischer Symptomatik eines Herpes genitalis, unabhängig vom Laborergebnis, vor [31,32]. Alternativ kann man die akute genitale HSV-Infektion oder asymptomatische Virusausscheidung über die Virusanzucht in der Gewebekultur diagnostizieren, wobei eine Typisierung der Virusisolate zweckmäßigerweise unter Verwendung von Fluorescein-markierten HSV-typspezifischen monoklonalen Antikörpern mittels Immunfluoreszenz vorgenommen wird. Prinzipiell stellt die Virusisolierung eine empfindliche Methode zum Nachweis des HSV dar, da sich HSV-1 und HSV-2 in vielen Zelltypen wie diploiden humanen embryonalen Fibroblasten oder permanenten Vero- und HEp-2-Zellen gut replizieren. Allerdings gilt die PCR aufgrund ihrer höheren Sensitivität [33] zu Recht in vielen Labors als Goldstandard. Bis heute wird jedoch neben der PCR die Virusisolierung als weitere Methode zur Diagnose des Genitalherpes empfohlen [31]. Der Direktnachweis von HSV-Antigenen mittels kommerzieller Nachweissysteme auf der Basis der Immunfluoreszenz ist eine häufig eingesetzte und preiswerte Methode, die innerhalb weniger Stunden ein Ergebnis liefert, aber eine eingeschränkte Sensitivität und Spezifität besitzt [34, 35]. Zu beachten ist, dass Methoden zum direkten Virusnachweis keine Unterscheidung von Primärinfektion, Rezidiv und asymptomatischer Virusausscheidung erlauben.

### Antikörpernachweis

Die Bestimmung von viruspezifischen Antikörpern zum Nachweis von HSV-Infektionen ist in der Praxis weit verbreitet. Dabei sollte man sich jedoch der Aussagekraft serologischer Ergebnisse bewusst sein. Die serologische HSV-Diagnostik (● **Tab. 1**) hat vor allem mit der Bestimmung von IgG zum Nachweis der Serokonversion nach Primärinfektion Bedeutung. Dies kann insbesondere für den Nachweis von HSV-2-Infektionen im Rahmen der Betreuung von Schwangeren von Wert sein. Der Nachweis einer Serokonversion kann auch mittels Bestimmung typenspezifischer IgG-Antikörper erfolgen, die aufgrund der sehr engen Verwandtschaft von HSV-1 und HSV-2 nur mit einem ELISA bzw. Immunoblot auf der Basis von gG-1 oder gC-1 von HSV-1 und von gG-2 von HSV-2 möglich ist [2,3]. Bei der Interpretation der Be-

**Tab. 2** Labordiagnostische Ergebnisse bei HSV-Infektionen in Abhängigkeit von Symptomen des Herpes genitalis.

| Klinik                           | HSV-Serologie   |               |               | PCR   |       | Interpretation/Infektionsstatus                                                                             |
|----------------------------------|-----------------|---------------|---------------|-------|-------|-------------------------------------------------------------------------------------------------------------|
|                                  | HSV-1/<br>2-IgG | HSV-1-<br>IgG | HSV-2-<br>IgG | HSV-1 | HSV-2 |                                                                                                             |
| primärer Herpes genitalis        | neg.            | neg.          | neg.          | pos.  | neg.  | akute HSV-1-Infektion                                                                                       |
|                                  | pos.            | neg.          | pos.          | pos.  | neg.  | akute HSV-1-Infektion, HSV-2-Latenz                                                                         |
|                                  | neg.            | neg.          | neg.          | neg.  | pos.  | akute HSV-2-Infektion                                                                                       |
|                                  | pos.            | pos.          | neg.          | neg.  | pos.  | akute HSV-2-Infektion, HSV-1-Latenz                                                                         |
| rezidivierender Herpes genitalis | pos.            | pos.          | neg.          | pos.  | neg.  | rekurrierende HSV-1-Infektion (Rezidiv)                                                                     |
|                                  | pos.            | pos.          | pos.          | pos.  | neg.  | rekurrierende HSV-1-Infektion, HSV-2-Latenz                                                                 |
|                                  | pos.            | neg.          | pos.          | neg.  | pos.  | rekurrierende HSV-2-Infektion (Rezidiv)                                                                     |
|                                  | pos.            | pos.          | pos.          | neg.  | pos.  | rekurrierende HSV-2-Infektion, HSV-1-Latenz                                                                 |
| keine genitalen Herpesläsionen   | neg.            | neg.          | neg.          | neg.  | neg.  | Seronegativität, Empfänglichkeit                                                                            |
|                                  | pos.            | pos.          | neg.          | neg.  | neg.  | zurückliegende HSV-1-Infektion (HSV-1-Latenz)                                                               |
|                                  | pos.            | neg.          | pos.          | neg.  | neg.  | zurückliegende HSV-2-Infektion (HSV-2-Latenz)                                                               |
|                                  | pos.            | pos.          | pos.          | neg.  | neg.  | zurückliegende HSV-1- und HSV-2-Infektion (HSV-1- und HSV-2-Latenz)                                         |
|                                  | pos.            | pos.          | neg.          | pos.  | neg.  | asymptomatische Ausscheidung von HSV-1, zurückliegende HSV-1-Infektion (HSV-1-Latenz)                       |
|                                  | pos.            | neg.          | pos.          | neg.  | pos.  | asymptomatische Ausscheidung von HSV-2, zurückliegende HSV-2-Infektion (HSV-2-Latenz)                       |
|                                  | pos.            | pos.          | pos.          | pos.  | neg.  | asymptomatische Ausscheidung von HSV-1, zurückliegende HSV-1- und HSV-2-Infektion (HSV-1- und HSV-2-Latenz) |
|                                  | pos.            | pos.          | pos.          | neg.  | pos.  | asymptomatische Ausscheidung von HSV-2, zurückliegende HSV-1- und HSV-2-Infektion (HSV-1- und HSV-2-Latenz) |

funde ist zu beachten, dass zwischen HSV-1 und HSV-2 eine partielle Kreuzimmunität besteht. Die Bedeutung des Nachweises von HSV-typenspezifischem IgG liegt vor allem in der schnellen, zuverlässigen und preiswerten Möglichkeit, Virusträger und potenzielle Virausscheider von HSV-2 zu erkennen [31,36]. So bedeutet der Nachweis von Anti-HSV-2-IgG, dass die betreffende Person als potenzieller Virausscheider und Virusüberträger einzustufen ist und möglicherweise auch an anogenitalen HSV-Infektionen leidet. Liegt eine Erstserumprobe aus der Frühphase einer Herpes-genitalis-Erkrankung vor, kann durch den Virus-typ-spezifischen DNA-Nachweis mittels PCR in Kombination mit Virustyp-spezifischem IgG-Nachweis zwischen Primärinfektion und Rezidiv unterschieden werden [37]. Dies bedeutet beispielsweise, dass bei einem Nachweis von HSV-2 im Genitalabstrich einer Schwangeren bis zu einigen Wochen vor der Entbindung ein primärer Genitalherpes von einem Rezidiv mittels HSV-typenspezifischem IgG unterschieden werden kann. Diese Unterscheidung ist insofern von wesentlicher Bedeutung, da das Risiko einer schwer verlaufenden neonatalen HSV-Infektion nach Primärinfektion um ein Vielfaches höher ist als nach einem Rezidiv. Obwohl HSV-typenspezifische Antikörperteste seit ca. 2 Jahrzehnten am Markt verfügbar sind, werden sie in Deutschland trotz der genannten Vorteile nur selten eingesetzt, und die meisten Labors bieten lediglich typenübergreifende HSV-Antikörpertests an [38,39]. Für die Unterscheidung zwischen Primärinfektion und Rezidiv kann auch der Aviditätsnachweis eingesetzt werden, wozu bislang aber nur wenige Erfahrungen existieren [40]. Ein negativer Anti-HSV-IgG-Nachweis schließt eine rezidivierende HSV-Infektion aus. **Tab. 2** gibt einen Überblick über virologische und serologische Befunde für die Labordiagnose von HSV-Infektionen mit oder ohne genitale Läsionen sowie einer asymptomatischen Virausscheidung. Die Bestimmung von Anti-HSV-IgM hat prinzipiell nur eine geringe Bedeutung für die frühzeitige Sicherung einer akuten HSV-

Infektion. Aufgrund von Kreuzreaktivitäten mit anderen Herpesviren, wie z.B. dem Varicella-Zoster-Virus, kann der IgM-Nachweis falsch positive Werte ergeben. Nur typenübergreifende HSV-IgM-Teste mit hoher Sensitivität und Spezifität sind dazu geeignet, akute HSV-Infektionen zu bestätigen [41]. Es ist jedoch zu beachten, dass der positive Vorhersagewert gering ist und dass mittels Nachweis von Anti-HSV-IgM keine Unterscheidung der Primärinfektion vom Rezidiv erfolgen kann. Obwohl IgM-Antikörper regelmäßig nach Primärinfektionen nachgewiesen werden können, kann IgM auch bei rezidivierenden Infektionen unabhängig von der klinischen Symptomatik positiv ausfallen. Auf den wenig zuverlässigen Nachweis HSV-typenspezifischer IgM-Antikörper sollte in der Praxis verzichtet werden [41]. **Abb. 1** gibt zusammenfassend eine Übersicht zum empfohlenen Algorithmus für die virologische Diagnostik des Herpes genitalis.

## Antivirale Therapie

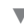

### Standardtherapie

**Tab. 3** vermittelt eine Übersicht über die Medikamente und Dosierungen zur antiviralen Therapie des Herpes genitalis auf der Basis aktueller Leitlinien [31,32,42,43]. Als Standardtherapeutika stehen Aciclovir, Valaciclovir und Famciclovir zur Verfügung. Die spezifische antivirale Wirkung dieser azyklischen Nukleosidanalogen Verbindungen [44] beruht darauf, dass sie durch die virale Thymidinkinase (TK), das Schlüsselenzym von HSV-1 und HSV-2, zum Monophosphat phosphoryliert werden, während die weiteren Phosphorylierungsschritte über das Di- zum Triphosphat durch zelluläre Enzyme erfolgen. Die Triphosphate der Nukleosidanaloga hemmen und fixieren die viralen DNA-Polymerasen bzw. werden als „falsches“ Substrat des Enzyms in die wachsende DNA-Kette eingebaut, was bei Aciclovir/Valaciclovir zum Kettenabbruch führt, da die zur weiteren Ver-

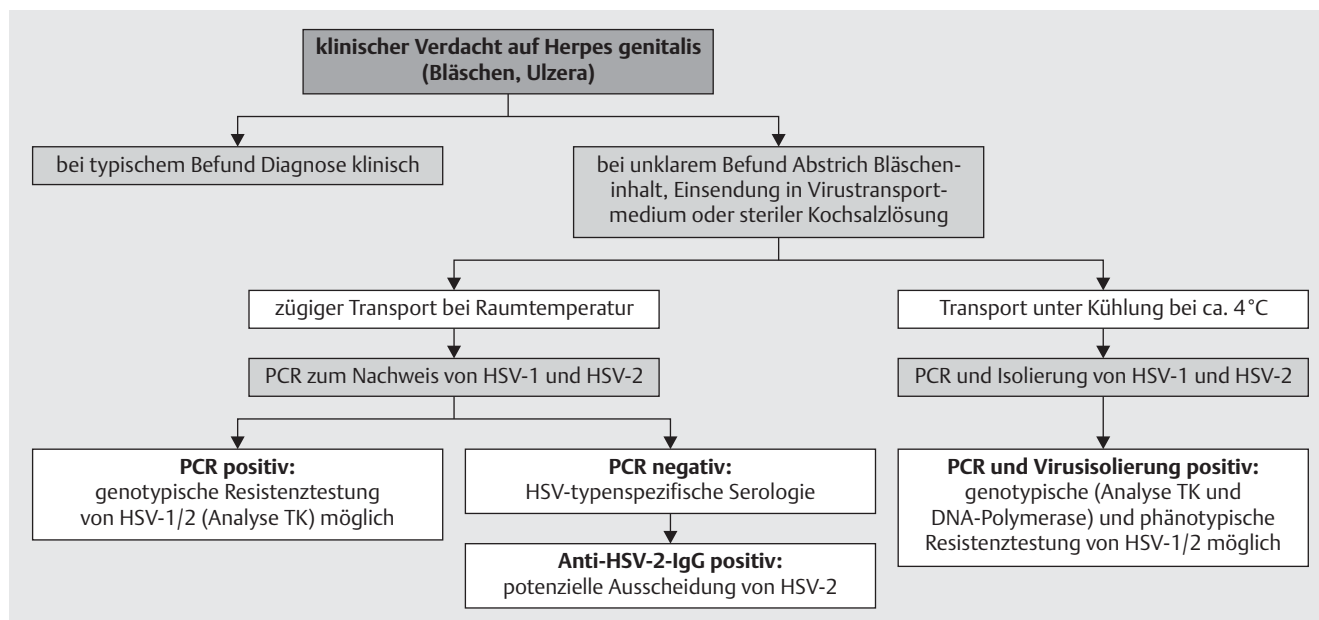

Abb. 1 Empfohlener Algorithmus zur virologischen Diagnostik des Herpes genitalis. PCR – Polymerasekettenreaktion, TK – Thymidinkinase.

Tab. 3 Antivirale Therapie des Herpes genitalis.

| Erkrankung/Art der Therapie                                               | Aciclovir                                                                                              | Valaciclovir                                                          | Famciclovir                                         | Foscarnet                                                                       |
|---------------------------------------------------------------------------|--------------------------------------------------------------------------------------------------------|-----------------------------------------------------------------------|-----------------------------------------------------|---------------------------------------------------------------------------------|
| primärer Herpes genitalis                                                 | 3 × 400 mg tgl. oral, 7–10 Tage                                                                        | 2 × 500 mg tgl. oral,<br>7–10 Tage                                    | 3 × 250 mg tgl. oral,<br>7–10 Tage                  |                                                                                 |
| primärer Herpes genitalis mit schwerem Verlauf                            | 5 × 200 mg tgl. oral, 7–10 Tage<br>3 × 5 mg/kgKG i. v. tgl., 5–7 Tage,<br>bei Immunsuppression 10 Tage |                                                                       |                                                     |                                                                                 |
| primärer Herpes genitalis bei Schwangerschaft <sup>1</sup>                | 5 × 200 mg tgl. oral, 10 Tage                                                                          |                                                                       |                                                     |                                                                                 |
| rezidivierender Herpes genitalis (< 5–6 Rezidive pro Jahr) <sup>2,3</sup> | 2 × 800 mg tgl. oral, 5 Tage                                                                           | 2 × 500 mg tgl. oral,<br>3 Tage                                       | 2 × 125 mg tgl. oral,<br>5 Tage                     |                                                                                 |
|                                                                           | 3 × 400 mg tgl. oral, 5 Tage                                                                           | 1 × 1 000 mg tgl. oral,<br>5 Tage                                     | 2 × 1 000 mg tgl. oral,<br>1 Tag                    |                                                                                 |
| rezidivierender Herpes genitalis bei Schwangerschaft                      | 3 × 800 mg tgl. oral, 2 Tage<br>3 × 400 mg tgl. oral, 10 Tage;<br>präventiv: 36. SSW bis Entbindung    | 2 × 250 mg tgl. oral,<br>3 Tage; präventiv:<br>36. SSW bis Entbindung |                                                     |                                                                                 |
| präventive Therapie vor Schwangerschaft                                   | 2 × 400 mg tgl. oral, max. 6 Monate <sup>5</sup>                                                       |                                                                       |                                                     |                                                                                 |
| Suppressionstherapie (≥ 5–6 Rezidive pro Jahr) <sup>3,4</sup>             | 2 × 400 mg tgl. oral, max. 6 Monate <sup>5</sup>                                                       | 1 × 500 mg tgl. oral,<br>max. 6 Monate <sup>5</sup>                   | 2 × 250 mg tgl. oral,<br>max. 6 Monate <sup>5</sup> |                                                                                 |
|                                                                           | 4 × 200 mg tgl. oral, max. 6 Monate <sup>5</sup>                                                       |                                                                       |                                                     |                                                                                 |
| rezidivierender Herpes genitalis mit Resistenz gegenüber Aciclovir        |                                                                                                        |                                                                       |                                                     | 3 × 40 (– 80) mg/kgKG i. v. bis klinische Besserung (max. 20 Tage) <sup>6</sup> |

KG – Körpergewicht, SSW – Schwangerschaftswoche.

<sup>1</sup> Aciclovir ist während der Schwangerschaft nicht zugelassen (Off-Label-Use). Insbesondere sollte eine Gabe vor Ende der 14. SSW vermieden werden.

<sup>2</sup> Leichte Erkrankungen können auch topisch mit Aciclovir oder Foscarnet behandelt werden. Dies ist insbesondere während einer Schwangerschaft nicht ausreichend.

<sup>3</sup> Bei immunsupprimierten Patienten (z. B. HIV) können erhöhte Dosierungen, verlängerte Behandlungsintervalle und Aciclovir i. v. notwendig sein.

<sup>4</sup> Entsprechend einer Cochrane-Studie [45] kann eine Suppressionstherapie schon bei mindestens 4 Rezidiven pro Jahr sinnvoll sein.

<sup>5</sup> Bei entsprechender Indikation (z. B. HIV) auch länger. Voraussetzungen für Suppressionstherapie: monatliche Kontrolle der Nieren- und Leberwerte.

<sup>6</sup> Alternativ: Cidofovir (5 mg/kgKG i. v. 1 × bzw. später 2 × pro Woche, Off-Label-Use); 1% Foscarnet-Creme oder 1% Cidofovir-Gel topisch.

knüpfung notwendige Hydroxygruppe in der 3'-Position fehlt. Bei Famciclovir ist eine Inkorporation in die DNA möglich. Aciclovir stellt das Therapeutikum der Wahl bei HSV-Infektionen einschließlich dem Herpes genitalis dar. Allerdings beträgt die orale Bioverfügbarkeit lediglich 15–30%. Haut- und Schleimhaut-

infektionen, auch der Herpes genitalis, werden bei immunkompetenten Personen oral behandelt. Bei schweren HSV-Infektionen, insbesondere bei Immundefizienten, sollte Aciclovir intravenös (i. v.) verabreicht werden. Zur Therapie des Herpes genitalis steht die Dosierung in Abhängigkeit vom Infektionsstatus, der

Immunkompetenz und dem Vorliegen einer Schwangerschaft. Liegen mehr als 4 [45] bis 6 Rezidive pro Jahr [31, 32, 42, 43] vor, sollte eine Suppressions-Dauertherapie erwogen werden, deren Nutzen insbesondere bei Schwangeren belegt worden ist [46]. Eine topische Aciclovir-Gabe wird nur beim Herpes labialis, der Keratoconjunctivitis herpetica und beim Herpes genitalis mit milder Symptomatik empfohlen. Aciclovir ist offiziell nicht für eine Behandlung während der Schwangerschaft zugelassen, wobei insbesondere eine Gabe vor Ende der 14. Schwangerschaftswoche vermieden werden sollte [22]. Die Ergebnisse eines Schwangerschaftsregisters durch einen Aciclovir-Hersteller und der Centers for Disease Control and Prevention (USA) [47] sowie eine retrospektive Kohortenstudie aus Dänemark [48] haben jedoch gezeigt, dass nach oraler inklusive topischer Aciclovir-Gabe nicht mit einer erhöhten Rate an Missbildungen zu rechnen ist. Da diese Daten, speziell in der Frühschwangerschaft, noch nicht für eine generelle Zulassung ausreichend sind, müssen schwangere Patienten vor einem Einsatz über die bislang nur begrenzte Datenlage aufgeklärt werden (Off-Label-Use). Nach i.v. Applikation von Aciclovir sind gelegentlich zentralnervöse Nebenwirkungen beschrieben worden, während die orale Gabe insbesondere mit gastrointestinalen Nebenwirkungen einhergehen kann. Nierentoxische Substanzen sollten nicht gleichzeitig mit Aciclovir gegeben werden. Nieren- und Leberwerte sind zu überwachen.

Bei Valaciclovir handelt sich um das oral applizierbare Prodrug, einem L-Valylester, von Aciclovir. Nach oraler Aufnahme wird es über ein hepatisches Enzym, die Valaciclovir-Hydrolase, in Aciclovir umgewandelt. Für Valaciclovir beträgt die orale Verfügbarkeit 54%. Dadurch werden 3- bis 4-fach höhere Wirkstoffkonzentrationen als nach oraler Gabe von Aciclovir erreicht, woraus eine Verlängerung der Dosierungsintervalle sowie eine verbesserte Compliance resultieren. Valaciclovir wird ebenfalls als Standardtherapeutikum zur Behandlung des Herpes genitalis bei immunkompetenten Patienten eingesetzt. In Studien wurde gleichfalls die Wirksamkeit für die Suppression des rezidivierenden Herpes genitalis belegt [46]. Da die Wirkung und das Sicherheitsprofil von Valaciclovir bislang nicht ausreichend an Kindern untersucht wurde, ist die Substanz für die antivirale Therapie bei Kindern und Jugendlichen nicht zugelassen. Dies gilt auch für Valaciclovir während der Schwangerschaft, da bislang nur wenige Daten zur Sicherheit in der Schwangerschaft existieren [48]. Mögliche Nebenwirkungen ähneln denen nach der Gabe von Aciclovir.

Bei Famciclovir handelt es sich um das inaktive Diacethylester-Prodrug des lediglich topisch wirksamen azyklischen Nukleotid-analogs Penciclovir, das durch Abspaltung von 2 Estergruppen im Dünndarm und in der Leber entsteht. Nach oraler Applikation besitzt Famciclovir eine Bioverfügbarkeit von 77%. Neben Aciclovir und Valaciclovir gehört Famciclovir zu den Standardtherapeutika des Herpes genitalis. Famciclovir ist ebenfalls nicht für Kinder und Jugendliche, immunsupprimierte Patienten unter 25 Jahren und Schwangere zugelassen. Es sollte deshalb auch nicht als Therapeutikum der Wahl für die Behandlung von Schwangeren eingesetzt werden [49]. In seltenen Fällen kann die Einnahme von Famciclovir zu Kopfschmerzen, Verwirrheitszuständen und Übelkeit führen.

### Alternative Therapiemöglichkeiten

Bei immunsupprimierten oder HIV-positiven Patienten mit Herpes genitalis kann es in bis zu 5% der Fälle nach längerer Behandlung zur Resistenz gegenüber Aciclovir/Valaciclovir einschließlich Kreuzresistenz gegenüber Famciclovir kommen [50, 51]. Für

solche Fälle wird als Alternativtherapeutikum das Pyrophosphat-analogen Foscarnet (● Tab. 3) empfohlen [35]. In Verbindung damit sollte eine phänotypische und/oder genotypische Resistenztestung erfolgen. Foscarnet hemmt die virale DNA-Polymerase zahlreicher DNA- und RNA-Viren durch Unterbindung des Pyrophosphataustauschs. Da diese Substanz für die Hemmung der Virusreplikation nicht metabolisiert werden muss, wirkt sie auch gegen TK-negative HSV-Stämme, die gegenüber Nucleosidanaloga resistent sind. Als wesentliche Nebenwirkungen treten Nierenfunktionsstörungen und toxisch bedingte Ulzera der Urogenitalschleimhaut auf. Da die 3-mal tägliche i.v. Gabe von Foscarnet ausschließlich unter stationären Bedingungen möglich ist, kann die 1- bzw. 2-mal wöchentliche i.v. Applikation von Cidofovir im Off-Label-Use eine weitere Alternative im Falle einer Aciclovir-Resistenz sein (● Tab. 3). Cidofovir ist primär nur für die Behandlung der Zytomegalievirus-Retinitis bei HIV-Infektionen zugelassen, prinzipiell aber auch gegen HSV wirksam. Allerdings stellen die ausgeprägte Nephrotoxizität und die noch fehlenden klinischen Erfahrungen bei der Therapie von HSV-Infektionen in der Praxis erhebliche Hürden dar. Prinzipiell ist ein Genitalherpes mit Foscarnet (oder Cidofovir) aufgrund seines häufig untypischen Charakters nur systemisch zu behandeln. Wesentliche Kontraindikationen sind Nierenfunktionsstörungen, Überempfindlichkeit, Schwangerschaft und Stillzeit. Ist eine systemische Gabe von Foscarnet (oder Cidofovir) aufgrund der Nebenwirkungen und Kontraindikationen bei Patienten mit Aciclovir-resistentem Herpes genitalis nicht möglich, kann auch eine topische Applikation von 1% Foscarnet-Creme oder 1% Cidofovir-Gel erfolgversprechend sein [52].

Eine neuartige Substanzklasse, die derzeit in klinischer Entwicklung und Erprobung befindlichen Helikase-Blocker, könnte in Zukunft zu wesentlichen Verbesserungen in der antiviralen Therapie des Herpes genitalis führen. Bislang konnte eine effektive Hemmung der HSV-Replikation in Zellkulturen, Tiermodellen und ersten klinischen Studien ohne das Auftreten von erheblichen Nebenwirkungen nachgewiesen werden. Man geht davon aus, dass sich Helikase-Blocker an den Helikase-Primase-Komplex, einer für die Virusreplikation essenziellen Proteinkomponente, binden und auf diese Weise die virale DNA-Synthese und somit die Virusreplikation effektiv inhibieren. In vitro und in vivo konnten bisher bessere Ergebnisse im Vergleich zu Aciclovir und Valaciclovir erreicht werden. Für das oral applizierte Pritelivir (BAY 57-1293, AIC316) ließ sich eine signifikante Reduktion klinischer Symptome sowie der Ausscheidung von HSV-2 bei Patienten mit Herpes genitalis belegen [53]. Helikase-Blocker sind ebenfalls gegenüber Aciclovir-resistenten HSV-Stämmen wirksam [54].

### Resistenztestung

Bei HSV-Infektionen, die innerhalb von mindestens 10 Tagen nicht auf die Therapie mit dem eingesetzten antiviralen Therapeutikum (meist Aciclovir/Valaciclovir) ansprechen, wird von einem klinischen Therapieversagen gesprochen, d.h. es besteht der Verdacht auf resistente Virusstämme [55]. In diesen Fällen sollte eine phänotypische und/oder genotypische Resistenztestung erfolgen. Diese speziellen Untersuchungsmethoden werden routinemäßig am Konsiliarlabor für HSV und VZV vorgehalten. Im Falle einer Resistenz gegenüber Aciclovir/Valaciclovir, die praktisch immer auch mit einer Kreuzresistenz gegenüber Famciclovir einhergeht, ist eine Alternativtherapie mit Foscarnet angezeigt [56]. Da insbesondere phänotypische Resistenzteste mit einem relativ hohen Zeitaufwand von mindestens 7–10 Tagen

verbunden sind, sollte bei ausgeprägter klinischer Resistenz das Ergebnis der Resistenztestung nicht abgewartet werden.

Für die phänotypische Resistenztestung werden in der Literatur Plaquereduktions- bzw. Zytopathischer-Effekt-Hemmteste, Dye-Uptake-Assays und DNA-Hybridisierungsassays beschrieben, wobei der Plaquereduktionstest die am häufigsten eingesetzte Methode darstellt [56]. Anhand der Hemmung morphologisch induzierter virusspezifischer Zellveränderungen, sogenannter zytopathischer Effekte, kann die Sensitivität von HSV gegenüber Virostatika bestimmt werden. Mittels Testung des Virostatikums in einer absteigenden geometrischen Verdünnungsreihe wird die mittlere inhibitorische Konzentration ( $IC_{50}$ ) des zu prüfenden Virostatikums bestimmt, die zu einer 50%igen Hemmung der Virusreplikation führt. Bislang gibt es noch keine internationale Standardisierung des Cut-off für eine Resistenz, was vor allem auf die biologische Störgröße „Zellkultur“ zurückzuführen ist. Es ist deshalb notwendig, in jedem Versuchsansatz einen TK-positiven Referenzstamm als Kontrolle mitzuführen. Am gebräuchlichsten und zuverlässigsten ist es, für Nukleosidanaloga und Cidofovir von einer Resistenz auszugehen, wenn die  $IC_{50}$  des betreffenden HSV-Stammes die  $IC_{50}$  des sensitiven Kontrollstamms 3- bis 5-fach überschreitet [57, 58]. Für die Testung von Foscarnet hat sich die Zugrundelegung eines Cut-off von  $330 \mu\text{M}$  bewährt [59]. Die Vorteile der Phänotypisierung bestehen vor allem in der zweifelsfreien Interpretation der Ergebnisse, weshalb diese Methode bis heute noch als Goldstandard zur Resistenztestung des HSV angesehen wird. Von Nachteil sind der hohe Zeit- und Materialaufwand, was durch die Isolierung und Testung der HSV-Stämme in der Zellkultur bedingt ist, sowie die fehlende Standardisierung. Eine phänotypische Resistenztestung ist praktisch nur möglich, wenn Bläschen- oder respiratorische Abstriche des Patienten vorliegen, aus denen das HSV gut isoliert werden kann. Aus Liquor, Blut oder Proben des Auges ist in den allermeisten Fällen eine Virusisolierung nicht erfolgreich.

Beim genotypischen Resistenztest werden meist das TK-Gen und das DNA-Polymerase-Gen amplifiziert und sequenziert [56]. Anschließend werden die Daten mit einem sensitiven Referenzstamm aus der Genbank (z. B. HSV-1-Stamm 17 Accession No. X14112, HSV-2-Stamm HG52 Accession No. Z86099) abgeglichen. Für eine Resistenz sprechen das Auffinden von Frameshift-Mutationen, zusätzliche Stopp-Codons sowie nichtsynonyme Nukleotidsubstitutionen in konservierten und funktionell wichtigen Genbereichen. Die Interpretation von Aminosäuresubstitutionen außerhalb aktiver oder konservierter Genregionen erfordert den Zugriff auf eine Datenbank, in der alle in der Literatur beschriebenen Resistenzmutationen zusammengefasst werden sollten [56]. Eine Resistenz von HSV-1 und HSV-2 gegenüber Aciclovir/Valaciclovir/Famciclovir ist in nahezu allen Fällen mit nichtsynonymen Mutationen im TK- bzw. selten im DNA-Polymerase-Gen und eine Resistenz gegenüber Foscarnet/Cidofovir mit entsprechenden Mutationen ausschließlich im DNA-Polymerase-Gen verbunden. Die derzeit zuverlässigste und praktikabelste Methode, um die Resistenzassoziation neuer, bislang unbekannter Aminosäuresubstitutionen zu belegen, ist der Abgleich von Resistenzphäno- und Resistenzgenotyp bei HSV-Isolaten. Der wesentliche Vorteil der Genotypisierung besteht in der direkten Testung von Patientenproben, was eine Virusisolierung in der Zellkultur überflüssig macht. In Abhängigkeit von der Höhe der Viruslast, können die Ergebnisse frühestens innerhalb von 2 Tagen vorliegen, was für eine Therapieentscheidung des Kliniklers von großer Bedeutung ist.

## Prophylaxe

### ▼ Impfung

Nicht nur von Ärzten, sondern auch von vielen Patienten, die vom Herpes genitalis betroffen sind, wird die Frage nach der Möglichkeit einer Impfprophylaxe gestellt. Obwohl sich die Forschung schon seit einigen Jahrzehnten mit diesem Problem beschäftigt, ist bis heute noch kein Impfstoff zur Bekämpfung des Herpes genitalis zugelassen. Hinsichtlich ihrer Wirkung werden „therapeutische“ von „prophylaktischen“ Impfstoffen unterschieden. Während man mit therapeutischen Impfstoffen das Ziel verfolgt, rezidivierende HSV-Infektionen sowie eine asymptomatische Virusausscheidung bei latent mit HSV infizierten Personen zu verhindern, zielen prophylaktische Impfstoffe auf eine Vermeidung von Primärinfektionen mit anschließender Viruslatenz ab. Dabei steht vor allem das HSV-2 im Fokus der Forschung. Eine große Zahl von Impfstoffen wurde bereits in vaginalen Tiermodellen der Maus und des Meerschweinchens geprüft [60], wobei aktuell vor allem Impfstoffe auf der Basis rekombinanter viraler Proteine im Vordergrund stehen und erfolgversprechend sind [61]. In randomisierten, placebokontrollierten Studien am Menschen konnten bislang mit adjuvantierten HSV-2-Protein-Subunit-Vakzinen [62, 63] sowie lebend attenuierten HSV-2 Deletionsmutanten [64, 65] noch keine durchschlagenden Erfolge erzielt werden, die eine Zulassung der Impfstoffe rechtfertigen. Obwohl mit diesen Impfstoffen nicht die Gefahr der Etablierung einer Viruslatenz durch das Impfvirus bzw. seiner Komponenten besteht, liegen wesentliche Schwierigkeiten in der signifikanten Reduktion der Anzahl von Rezidiven sowie in der Verhinderung genitaler Erstinfektionen sowohl durch HSV-1 als auch HSV-2. Hoffnung gibt die Erkenntnis, dass der Schutz vor Primärinfektionen vor allem durch virusspezifische Antikörper vermittelt wird, während für die Prävention von Rezidiven die zelluläre Immunantwort von entscheidender Bedeutung ist [60, 66]. Dabei muss die Impfstoffvermittelte zelluläre Immunität stärker sein als die nach natürlicher HSV-Infektion.

### Andere Maßnahmen

Eine wesentliche Komponente bei der medizinischen Betreuung von Patienten mit Herpes genitalis ist eine ausführliche und fundierte Beratung von Partnerschaften. Ein wichtiges Instrument ist dabei die HSV-typenspezifische Serologie, mit der es gelingt, HSV-2-Carrier bzw. Virusüberträger zu identifizieren. Lassen sich beim Partner HSV-2-seropositiver Personen keine HSV-2-spezifischen Antikörper nachweisen, sollte zum Gebrauch von Kondomen geraten werden [67]. Liegen symptomatische Hinweise auf einen Herpes genitalis vor, sollte von einem Geschlechtsverkehr abgeraten werden [68]. Da diese Maßnahmen insbesondere zur Vermeidung einer Virusübertragung während einer Schwangerschaft sinnvoll sind, sollten beide Partner über den HSV-Serostatus und die möglichen Konsequenzen einer Virusübertragung sowohl bei symptomatischem Herpes genitalis als auch bei asymptomatischer Virusausscheidung aufgeklärt werden. Bei Frauen mit starker emotionaler Stressbelastung kann eine psychotherapeutische Behandlung hilfreich sein, die Anzahl von Herpes-genitalis-Rezidiven zu reduzieren.

Eine Option zur Prävention des Herpes genitalis durch Virusübertragung mittels Geschlechtsverkehr können in Zukunft auch mikrobizide Substanzen in Form von Gels, Cremes oder Lotions darstellen. Die am besten untersuchte Substanz ist derzeit Tenofovir, ein nukleosidanaloger Revertase-Hemmer, der zur Behandlung von HIV-Infektionen zugelassen ist. In Studien konnte gezeigt

werden, dass die vaginale Applikation von Tenofovir-Gel 12 Stunden vor dem Geschlechtsverkehr eine HSV-2-Infektion bei HSV-2-negativen Frauen zwar verhindern [69], aber bei Frauen mit bekanntem Herpes genitalis eine asymptomatische Virusausscheidung oder genitale Symptome nicht vermeiden kann [70]. Ein anderes vielversprechendes Mikrobizid, das nach vaginaler Applikation die Replikation von HSV inhibieren kann, ist Viva-Gel®, welches das durch Nanotechnologie hergestellte Dendrimer SPL7013 als aktive Substanz enthält [71]. Diese Mikrobizide können jedoch in Zukunft bestenfalls eine Ergänzungsoption für die Prävention des Herpes genitalis darstellen.

### Fazit für die Praxis

▼  
Mit einer fachlich fundierten Beratung sowie Umsetzung der bestehenden Möglichkeiten zur Diagnostik, Therapie und Prävention lässt sich die gegenwärtig oft unbefriedigende medizinische Betreuung von Patienten mit Herpes genitalis wesentlich verbessern. Trotzdem bestehen noch Defizite, insbesondere was die derzeitigen Möglichkeiten der antiviralen Therapie und Prophylaxe häufig auftretender rezidivierender Infektionen betrifft. Entscheidende Verbesserungen lassen sich dabei in Zukunft durch die neue Substanzgruppe der Helikase-Blocker und die Einführung wirksamer Impfstoffe erwarten.

### Interessenkonflikt

▼  
Nein.

### Literatur

- 1 King AM, Adams MJ, Carstens EB, Lefcowitz EJ, Hrsg. Virus Taxonomy. Ninth Report of the International Committee on Taxonomy of Viruses. San Diego, CA: Elsevier Academic Press; 2012: 99–124
- 2 Bergström T, Trybala E. Antigenic differences between HSV-1 and HSV-2 glycoproteins and their importance for type-specific serology. Intervirology 1996; 39: 176–184
- 3 Schepher T, Saschenbrecker S, Steinhagen K et al. The glycoproteins C and G are equivalent target antigens for the determination of herpes simplex virus type 1-specific antibodies. J Virol Methods 2010; 166: 42–47
- 4 Sauerbrei A, Schmitt S, Schepher T et al. Seroprevalence of herpes simplex virus type 1 and type 2 in Thuringia, Germany, 1999 to 2006. Euro Surveill 2011; 16: pii: 20005
- 5 Wutzler P, Doerr HW, Färber I et al. Seroprevalence of herpes simplex virus type 1 and type 2 in selected German populations—relevance for the incidence of genital herpes. J Med Virol 2000; 61: 201–207
- 6 Smith JS, Robinson NJ. Age-specific prevalence of infection with herpes simplex virus types 2 and 1: a global review. J Infect Dis 2002; 186 (Suppl. 1): S3–S28
- 7 Langenberg AG, Corey L, Ashley RL et al. A prospective study of new infections with herpes simplex virus type 1 and type 2. Chirion HSV Vaccine Study Group. N Engl J Med 1999; 341: 1432–1438
- 8 Roberts CM, Pfister JR, Spear SJ. Increasing proportion of herpes simplex virus type 1 as a cause of genital herpes infection in college students. Sex Transm Dis 2003; 30: 797–800
- 9 Peña KC, Adelson ME, Mordechai E et al. Genital herpes simplex virus type 1 in women: detection in cervicovaginal specimens from gynecological practices in the United States. J Clin Microbiol 2010; 48: 150–153
- 10 Freeman EE, Weiss HA, Glynn JR et al. Herpes simplex virus 2 infection increases HIV acquisition in men and women: systematic review and meta-analysis of longitudinal studies. AIDS 2006; 20: 73–83
- 11 Bernstein DI, Bellamy AR, Hook EW 3rd et al. Epidemiology, clinical presentation, and antibody response to primary infection with herpes simplex virus type 1 and type 2 in young women. Clin Infect Dis 2013; 56: 344–351

- 12 Corey L, Adams HG, Brown ZA et al. Genital herpes simplex virus infections: clinical manifestations, course, and complications. Ann Intern Med 1983; 98: 958–972
- 13 Stevens JG, Cook ML. Latent herpes simplex virus in spinal ganglia of mice. Science 1971; 173: 843–845
- 14 Perna JJ, Mannix ML, Rooney JF et al. Reactivation of latent herpes simplex virus infection by ultraviolet light: a human model. J Am Acad Dermatol 1987; 17: 473–478
- 15 Rand KH, Hoon EF, Massey JK et al. Daily stress and recurrence of genital herpes. Arch Intern Med 1990; 150: 1889–1893
- 16 Benedetti J, Corey L, Ashley R. Recurrence rates in genital herpes after symptomatic first-episode infection. Ann Intern Med 1994; 121: 847–854
- 17 Engelberg R, Carrell D, Krantz E et al. Natural history of genital herpes simplex virus type 1 infection. Sex Transm Dis 2003; 30: 174–177
- 18 Gupta R, Warren T, Wald A. Genital herpes. Lancet 2007; 370: 2127–2137
- 19 Whitley RJ, Roizman B. Herpes simplex virus infections. Lancet 2001; 357: 1513–1518
- 20 Catotti DN, Clarke P, Catoe KE. Herpes revisited. Sex Transm Dis 1993; 20: 77–80
- 21 Hofstetter AM, Rosenthal L, Stanberry LR. Current thinking on herpes genitalis. Curr Opin Infect Dis 2014; 27: 75–83
- 22 Sauerbrei A. Herpes-simplex-Virusinfektionen. In: DVV, GfV, Hrsg. S2k-Leitlinie Labordiagnostik schwangerschaftsrelevanter Virusinfektionen. Berlin, Heidelberg: Springer; 2014: 145–157
- 23 Anzivino E, Fioriti D, Mischitelli M et al. Herpes simplex virus infection in pregnancy and in neonate: status of art of epidemiology, diagnosis, therapy and prevention. Virol J 2009; 6: 40
- 24 Sauerbrei A, Wutzler P. Herpes simplex and varicella-zoster virus infections during pregnancy – current concepts of prevention, diagnosis and therapy. Part 1: Herpes simplex virus infections. Med Microbiol Immunol 2007; 196: 89–94
- 25 Rudnick CM, Hoekzema GS. Neonatal herpes simplex virus infections. Am Fam Physician 2002; 6: 1138–1142
- 26 Corey L, Wald A. Maternal and neonatal HSV infections. N Engl J Med 2009; 361: 1376–1385
- 27 Kohl S. Neonatal herpes simplex virus infection. Clin Perinatol 1997; 24: 129–150
- 28 Deutsche STI-Gesellschaft. S1-Leitlinie STI/STD – Beratung, Diagnostik und Therapie. Online: [http://www.awmf.org/uploads/tx\\_szleitlinien/059-006L\\_S1\\_STI\\_STD-Beratung\\_2015-07.pdf](http://www.awmf.org/uploads/tx_szleitlinien/059-006L_S1_STI_STD-Beratung_2015-07.pdf); Stand: 22.06.2016
- 29 Sauerbrei A, Eichhorn U, Hottenrott G et al. Virological diagnosis of herpes simplex encephalitis. J Clin Virol 2000; 17: 31–36
- 30 LeGoff J, Péré H, Bélec L. Diagnosis of genital herpes simplex virus infection in the clinical laboratory. Virol J 2014; 11: 83
- 31 Workowski KA, Bolan GA; Centers for Disease Control and Prevention. Sexually transmitted diseases treatment guidelines, 2015. MMWR Recomm Rep 2015; 64: 1–137
- 32 Patel R, Alderson S, Geretti A et al. European guideline for the management of genital herpes, 2010. Int J STD AIDS 2011; 22: 1–10
- 33 Wald A, Huang ML, Carrell D et al. Polymerase chain reaction for detection of herpes simplex virus (HSV) DNA on mucosal surface: comparison with HSV isolation in cell culture. J Infect Dis 2003; 188: 1345–1351
- 34 Sauerbrei A, Eichhorn U, Schacke M et al. Laboratory diagnosis of herpes zoster. J Clin Virol 1999; 14: 31–36
- 35 Wagenlehner FM, Brockmeyer NH, Discher T et al. The presentation, diagnosis and treatment of sexually transmitted infections. Dtsch Arztebl Int 2016; 113: 11–23
- 36 Swiss Herpes Management Forum. Swiss recommendations for the management of genital herpes and herpes simplex virus infection of the neonate. Swiss Med Wkly 2004; 134: 205–214
- 37 Brown ZA. Case study: type-specific HSV serology and the correct diagnosis of first-episode genital herpes during pregnancy. Herpes 2002; 9: 24–26
- 38 Zahariadis G, Severini A. Evaluation of a novel serology algorithm to detect herpes simplex virus 1 or 2 antibodies. Sex Transm Dis 2010; 37: 696–699
- 39 Bentley J, Neubauer A, Sauerbrei A. Value of herpes simplex virus type-specific serology: a case report. J Clin Virol 2012; 54: 269–271
- 40 Hashido M, Inouye S, Kawana T. Differentiation of primary genital herpes infections by a herpes simplex virus-specific immunoglobulin G avidity assay. J Clin Microbiol 1997; 35: 1766–1768
- 41 Liermann K, Schäfler A, Henke A et al. Evaluation of commercial HSV IgG and IgM enzyme immunoassays. J Virol Methods 2014; 199: 29–34



- 42 *Public Health Agency of Canada*. Canadian guidelines on sexually transmitted infections. Section 5 – Management and treatment of specific infections. Genital herpes simplex virus (HSV) infections. Online: <http://www.phac-aspc.gc.ca/std-mts/sti-its/cgsti-ldcits/section-5-4-eng.php>; Stand: 11.08.2016
- 43 *German STI-Society*. STI-Treatment Pocket Guide. Online: [http://dstig.de/images/DSTIG-Flyer/Leitfaden/sti-treatment%20pocket%20guide\\_2014.2015\\_web.pdf](http://dstig.de/images/DSTIG-Flyer/Leitfaden/sti-treatment%20pocket%20guide_2014.2015_web.pdf); Stand: 22.06.2016
- 44 *De Clercq E*. Selective anti-herpesvirus agents. *Antivir Chem Chemother* 2013; 23: 93–101
- 45 *Le Cleach L, Trinquart L, Do G et al*. Oral antiviral therapy for prevention of genital herpes outbreaks in immunocompetent and nonpregnant patients (review). *Cochrane Database Syst Rev* 2014; (8): CD009036
- 46 *Hollier LM, Wendel D*. Third trimester antiviral prophylaxis for preventing maternal genital herpes simplex virus (HSV) recurrences and neonatal herpes. *Cochrane Database Syst Rev* 2008; (1): CD004946
- 47 *Stone KM, Reiff-Eldridge R, White AD et al*. Pregnancy outcomes following systemic prenatal acyclovir exposure: conclusions from the international acyclovir pregnancy registry, 1984–1999. *Birth Defects Res Clin Mol Teratol* 2004; 70: 201–207
- 48 *Pasternak B, Hviid A*. Use of acyclovir, valacyclovir, and famciclovir in the first trimester of pregnancy and the risk of birth defects. *JAMA* 2010; 304: 859–866
- 49 *Kang SH, Chua-Gocheco A, Einarson A*. Safety of antiviral medication for the treatment of herpes during pregnancy. *Can Fam Physician* 2011; 57: 427–428
- 50 *Danve-Szataneck C, Aymard M, Thouvenot D et al*. Surveillance network for herpes simplex virus resistance to antiviral drugs: 3-year follow-up. *J Clin Microbiol* 2004; 42: 242–249
- 51 *Reyes M, Shaik NS, Graber JM et al*. Acyclovir-resistant genital herpes among persons attending sexually transmitted disease and human immunodeficiency virus clinics. *Arch Intern Med* 2003; 163: 76–80
- 52 *Patel R, Green J, Clarke E et al*. 2014 UK national guideline for the management of anogenital herpes. *Int J STD AIDS* 2015; 26: 763–776
- 53 *Wald A, Corey L, Timmler B et al*. Helicase-primase inhibitor pritelivir for HSV-2 infection. *N Engl J Med* 2014; 370: 201–210
- 54 *Collot M, Rouard C, Brunet C et al*. High conservation of herpes simplex virus UL5/UL52 helicase-primase complex in the era of new antiviral therapies. *Antiviral Res* 2016; 128: 1–6
- 55 *Balfour HH jr., Benson C, Braun J et al*. Management of acyclovir-resistant herpes simplex and varicella-zoster virus infections. *J Acquir Immune Defic Syndr* 1994; 7: 254–260
- 56 *Sauerbrei A, Bohn-Wippert K, Kaspar M et al*. Database on natural polymorphisms and resistance-related non-synonymous mutations in thymidine kinase and DNA polymerase genes of herpes simplex virus type 1 and 2. *J Antimicrob Chemother* 2016; 71: 6–16
- 57 *Morfin F, Thouvenot D*. Herpes simplex virus resistance to antiviral drugs. *J Clin Virol* 2003; 26: 29–37
- 58 *Schmidt S, Bohn-Wippert K, Zell R et al*. Sequence analysis of herpes simplex virus type 1 thymidine kinase and DNA polymerase genes from over 300 clinical isolates from 1973–2014 finds novel mutations which may be relevant for development of antiviral resistance. *Antimicrob Agents Chemother* 2015; 59: 4938–4945
- 59 *Safrin S, Crumacker C, Chatis P et al*. A controlled trial comparing foscarnet with vidarabine for acyclovir-resistant mucocutaneous herpes simplex in the acquired immunodeficiency syndrome. *N Engl J Med* 1991; 325: 551–555
- 60 *Awasthi S, Friedman M*. Status of prophylactic and therapeutic genital herpes vaccines. *Curr Opin Virol* 2014; 6: 6–12
- 61 *Odegard JM, Flynn PA, Campbell DJ et al*. A novel HSV-2 subunit vaccine induces GLA-dependent CD4 and CD8 T cell responses and protective immunity in mice and guinea pigs. *Vaccine* 2016; 34: 101–109
- 62 *Straus SE, Corey L, Burke RL et al*. Placebo-controlled trial of vaccination with recombinant glycoprotein D of herpes simplex virus type 2 for immunotherapy of genital herpes. *Lancet* 1994; 343: 1460–1463
- 63 *Straus SE, Wald A, Kost RK et al*. Immunotherapy of recurrent genital herpes with recombinant herpes simplex virus type 2 glycoprotein D and B. results of a placebo-controlled vaccine trial. *J Infect Dis* 1997; 176: 1129–1134
- 64 *Casanova G, Cancela R, Alonzo L et al*. A double-blind study of the efficacy and safety of the ICP10deltaPK vaccine against recurrent genital HSV-2 infections. *Cutis* 2002; 70: 235–239
- 65 *deBruyn G, Vargas-Cortez M, Warren T et al*. A randomized controlled trial of a replication defective (gH deletion) herpes simplex virus vaccine for the treatment of recurrent genital herpes among immunocompetent subjects. *Vaccine* 2006; 24: 914–920
- 66 *Halford WP, Geltz J, Messer RJ et al*. Antibodies are required for complete vaccine-induced protection against herpes simplex virus 2. *PLoS One* 2015; 10: e0145228
- 67 *Stanaway JD, Wald A, Martin ET et al*. Case-crossover analysis of condom use and herpes simplex virus type 2 acquisition. *Sex Transm Dis* 2012; 39: 388–393
- 68 *Gottlieb SL, Douglas JM jr., Foster M et al*. Incidence of herpes simplex virus type 2 infection in 5 sexually transmitted disease (STD) clinics and the effect of HIV/STD risk-reduction counselling. *J Infect Dis* 2004; 15: 1059–1067
- 69 *Abdool Karim SS, Abdool Karim Q, Kharsany AB et al*. Tenofovir gel for the prevention of herpes simplex virus type 2 infection. *N Engl J Med* 2015; 373: 530–539
- 70 *Bender Ignacio RA, Perti T, Magaret AS et al*. Oral and vaginal tenofovir for genital herpes simplex virus type 2 shedding in immunocompetent women: a double-blind, randomized, cross-over trial. *J Infect Dis* 2015; 212: 1949–1956
- 71 *Price CF, Tyssen D, Sonza S et al*. SPL7013 Gel (VivaGel®) retains potent HIV-1 and HSV-2 inhibitory activity following vaginal administration in humans. *PLoS One* 2011; 6: e24095
